# Supplementary material
Source: publisher figshare collection journal article supplement (https://acs.figshare.com/ndownloader/files/3819886)
Supplement: Supplementary file 1 [file 3819886]

Supporting Information

**Gene expression of an *Arthrobacter* in surfactant-enhanced biodegradation of a hydrophobic organic compound**

Feng Li<sup>a,b,c</sup>, Lizhong Zhu<sup>a,b\*</sup>, Lingwen Wang<sup>a,b</sup>, Yu Zhan<sup>a,b</sup>

<sup>a</sup> Department of Environmental Science, Zhejiang University, Hangzhou 310058, China

<sup>b</sup> Zhejiang Provincial Key Laboratory of Organic Pollution Process Control, Hangzhou 310058, China

<sup>c</sup> Department of Environmental Science and Engineering, Xiangtan University, Xiangtan 411105, China

\* Corresponding author. Department of Environmental Science, Zhejiang University, Hangzhou, Zhejiang 310058, China. Phone / Fax: +86 571 88273733. *E-mail address:* [zlz@zju.edu.cn](mailto:zlz@zju.edu.cn).

Number of pages: 26

Number of tables: 4

Number of figures: 14

Journal: *Environmental Science and Technology*

Date prepared: February 7, 2015

## *Table of Contents*

|                                                            |  |
|------------------------------------------------------------|--|
| 1. Determination of the biomass of SA02 cells              |  |
| 2. Abiotic loss of phenanthrene                            |  |
| 3. Phenanthrene extraction                                 |  |
| 4. Measurement of SDBS concentration                       |  |
| 5. Transmission electron microscopy analysis of SA02 cells |  |
| 6. Exaction of total RNA of SA02 cells                     |  |
| 7. Reverse transcription PCR (RT-PCR) setting              |  |
| 8. Quantitative PCR setting.                               |  |
| 9. Cultivation in the PUM medium                           |  |

## *Supporting Tables*

|                                                                                                                                                                                               |  |
|-----------------------------------------------------------------------------------------------------------------------------------------------------------------------------------------------|--|
| Table S1. Oligonucleotide primers used in RT-qPCR.                                                                                                                                            |  |
| Table S2. The changes of fatty acid content (%) of <i>Arthrobacter</i> sp. SA02 cells under different concentrations of SDBS.                                                                 |  |
| Table S3. GC retention times and mass spectral data of phenanthrene metabolites by <i>Arthrobacter</i> sp. SA02                                                                               |  |
| Table S4. The expression levels of RHD gene, 1H2Nase gene and $\Delta 9$ fatty acid desaturase gene of strain SA02 grown in the LB medium containing SDBS (10, 30 and 50 mg L <sup>-1</sup> ) |  |

## **Supporting Figures**

**Figure S1.** The agarose electrophoresis of the qPCR amplification fragments of the endogenous gene (16S rRNA) and the target genes: (a)  $\Delta 9$  fatty acid desaturase gene, (b) 1H2Nase gene and (c) RHDase gene. Note: M, DNA marker; 1, 3 and 5, 16S rRNA; 2, 4 and 6,  $\Delta 9$  fatty acid desaturase, 1H2Nase, and RHDase genes.

**Figure S2.** The melting curves of the endogenous gene 16S rRNA and the target genes: (a)  $\Delta 9$  fatty acid desaturase gene, (b) 1H2Nase gene and (c) RHDase gene by real time qPCR. The melting temperatures of these genes were clearly distinguished, indicating that the reaction procedure of qPCR was reasonable.

**Figure S3.** Effect of SDBS on cell surface microstructure of strain SA02 (A) LB culture (B) phenanthrene, (C-F) phenanthrene+Tween 80:10, 30 50 and 80 mg L<sup>-1</sup>, respectively.

**Figure S4.** The relative quantities (i.e., expression levels) of (a) RHDase gene and (b) 1H2Nase gene of strain SA02 grown in 1.0 mg L<sup>-1</sup> of phenanthrene and different SDBS concentrations (0, 10, 30 and 50 mg L<sup>-1</sup>), and in the LB medium without phenanthrene and SDBS.

**Figure S5.** The changes of DPH fluorescence anisotropy in the membranes of SA02 cells under SDBS.

**Figure S6.** Effect of SDBS on phenanthrene partition (mean  $\pm$  sd) on strain SA02 cells.

**Figure S7.** The GC-MS chromatograms of phenanthrene metabolites by strain SA02 on 4th day. 1. Peaks 1-4 denote salicylic acid, phthalic acid, protocatechuic acid and 1-hydroxy-2-naphthoic acid, respectively, all of which are trimethylsilyl (TMS) derivatives.

**Figure S8.** Effect of SDBS on the cell surface hydrophobicity (mean  $\pm$  sd) of strain SA02 cells grown in the PUM medium and the replaced propionate with phenanthrene (1.0 mg L<sup>-1</sup>) plus SDBS (0, 10, 30 and 50 mg L<sup>-1</sup>, respectively) as the treatments.

**Figure S9.** (a) The growth and (b) cell surface hydrophobicity (CSH) of strain SA02

grown in the LB medium containing SDBS (0, 10, 30 and 50 mg L<sup>-1</sup>).

**Figure S10.** The expression level of RHDase gene of strain SA02 grown in the MSM medium containing SDBS (10, 30 and 50 mg L<sup>-1</sup>). Strain SA02 cells grown in the LB medium (in the absence of phenanthrene and SDBS) for 24 hours were used as the control.

**Figure S11.** The relationship between the biomass of strain SA02 and its DNA contents.

**Figure S12.** The concentration changes of SDBS when strain SA02 grew in the MSM medium with SDBS (10, 30 and 50 mg L<sup>-1</sup>) and in the absence of phenanthrene.

**Figure S13.** The concentration changes of SDBS when strain SA02 grew in the MSM medium with SDBS (10, 30 and 50 mg L<sup>-1</sup>) and in the presence of phenanthrene (1.0 mg L<sup>-1</sup>).

**Figure S14.** The biomass changes of strain SA02 grown in the MSM medium containing SDBS (10, 30 and 50 mg L<sup>-1</sup>) as the sole carbon source in the absence of phenanthrene.

## **1. Determination of the biomass of SA02 cells**

Strain SA02 cells cultivated in the LB medium for 24 hours (300 mL) were centrifuged, washed twice with MSM medium and centrifuged again before the strain SA02 cell pellets were freeze-dried. Then, the mass of the freeze-dried SA02 cells was determined using the electronic scale with a weighing accuracy of 0.001 milligram (METTLER TOLEDO XP6). The biomass of the freeze-dried SA02 cells was 38.4 µg, 21.7 µg, 13.5 µg, 5.3 µg and 3 µg. The DNA from those SA02 cells were extracted by the microbial DNA isolation Kit (Dongsheng Biotech, China). The extracted DNA was diluted to 100 µL. The DNA contents were determined using a Nanodrop ND-1000 spectrophotometer (Nanodrop Technologies, Delaware, USA). The absorbance ratio of 260 nm and 280 nm was restricted to the range of 1.7-1.9. The linear relationship between the biomass of strain SA02 cells (µg) and its DNA contents (ng) was established.

In the main experiments, 10 mL sample was centrifuged ( $12,000\times g$ , 15min) every two days to obtain the SA02 cell pellets. The SA02 cell pellets were used to extract the DNA by the the microbial DNA isolation Kit as the method described by the manufacture. The DNA contents were determined using Nanodrop ND-1000 spectrophotometer. The SA02 biomass was calculated by the linear correlation established above.

## **2. Abiotic loss of phenanthrene**

The results from the abiotic control experiments show that the loss of phenanthrene through volatilization and other abiotic processes was approximately 1.2% in the 12 days.

## **3. Phenanthrene extraction**

The equilibrium concentration of phenanthrene in each supernatant was analyzed using our previous method,<sup>4</sup> where the method quantification limit value for phenanthrene was 3.21  $\mu\text{g L}^{-1}$ , and the relative standard deviation (RSD) for the determination of phenanthrene was 0.36% (n=6). In brief, supernatants (0.5 mL) were diluted with methanol (0.5 mL) before filtration through Teflon filter units ( $\Phi$ 0.22  $\mu\text{m}$ , Pallflex Products Corp., USA), and analyzed by high-performance liquid chromatography (HPLC, Agilent 1200 series) equipped a 4.6 $\times$ 150 mm reverse phase XDB-C18 column and a fluorescence detector using methanol and water (V:V, 90:10) as mobile phase at a flow rate of 1 mL min<sup>-1</sup>. The excitation and emission wavelengths for phenanthrene were 244 and 360 nm, respectively. Methanol (0.5 mL) was added to avoid phenanthrene adsorption onto the Teflon filter units and the effect of surfactant sensitization. Then, the cell pellet was washed with 1.0 mL MSM for two times by the resuspension and then centrifugation, cleaning out the adsorbed surfactant on the cell surface of strain SA02. Next, the phenanthrene that was adsorbed in the surface and entered into the cells was ultrasonically extracted with 1.0 mL of methanol for 15 min at a stable temperature (less than 10 °C) by the cooling water circulation prior to analyze by HPLC. The recovery of methanol extraction covered the range of 97.6-99.8%.

#### **4. Measurement of SDBS concentration**

In every other day, 10 mL broth was centrifuged to collect the supernatant. The SDBS concentration in the supernatant was analyzed by HPLC (Agilent 1200 series) with a 4.6 $\times$ 150 mm reverse phase XDB-C18 column and a UV detector (224 nm) using methanol and water mixture (V:V, 70:30) as mobile phase at a flow rate of 1 mL/min.

#### **5. Transmission electron microscopy analysis of SA02 cells**

The effects of surfactants on the ultrastructural features of the cell surfaces were analyzed using transmission electron microscopy (TEM)<sup>1,2</sup>. Briefly, 100 mL broth was taken, centrifuged and resuspended in the mineral salt medium (MSM) twice. To fix strain SA02 cells, the samples were centrifuged and resuspended in 1 mL of 2.5% glutaraldehyde solution overnight at 4 °C in phosphate buffer (0.1 mol L<sup>-1</sup>, pH 7.0). The fixed pellets were centrifuged, decanted and rinsed twice before embedding in 2% agar. Cells in agar were postfixed in phosphate buffer (pH 7.0) with 1% OsO<sub>4</sub> for 1 h, rinsed and serially ascending dehydrated (50%, 70%, 80%, 90%, 95% and 100% ethanol). Cells in agar were then transferred to acetone, infiltrated and finally embedded in Spurr resin (Ted Pella, Redding, California, USA) and left to polymerize in an oven at 60 °C for 24 hours. The polymerized samples were sectioned into slices of 60 nm thick using a microtome. The slices were stained by uranyl acetate and alkaline lead citrate prior to examination in the TEM (Model JEM-1230, JEOL, Tokyo, Japan).

## **6. Exaction of total RNA of SA02 cells**

SA02 cells (on the 2nd, 4th, 6th, 8th and 10th days) were harvested from the broth by centrifugation at 12,000×g at 4 °C for 3 min, after the addition of 1.0 mL frozen killing buffer (20 mmol L<sup>-1</sup> Tris/HCl[ pH7.5], 5 mmol/L MgCl<sub>2</sub>, 20 mmol L<sup>-1</sup> NaN<sub>3</sub>) to the culture sample. After discarding the supernatant, 100 µL of the lysing solution was added to the cell pellets, along with 10 µL β-mercaptoethanol and 700 µL RD solution. The supernatant was added to a new tube after centrifugation at 12,000×g at 4 °C for 1 min, and 700 µL RB solution was added. The solution was subsequently transferred to the RNA purification column before centrifugation at 12,000×g at 4 °C for 1 min. RP solution (700 µL) was added to the above RNA purification column before centrifugation at 12,000×g at 4 °C for 1 min. RW solution (500 µL) was added to the above RNA

purification column, incubated for 2 min before centrifugation at 12,000×g at 4 °C for 1 min, and this process was repeated. After centrifugation at 12,000×g at 4 °C for 1 min, the above RNA purification column was transferred into a new RNase-free tube before reconstitution in 20 µL RNase-free water.<sup>3</sup>

## **7. Reverse transcription PCR (RT-PCR) setting**

The random hexamers and RNA templates were mixed and denatured at 70 °C for 5 min followed by cooling for 2 minutes on ice. The 5×first-strand buffer (4 µL), dNTPs (1 µL, 10 mmol L<sup>-1</sup> each), M-MLV (1 µL) and RNase inhibitor (0.6 µL) were added to the cooled template mix and incubated for 1 hour at 37 °C before enzyme inactivation at 70 °C for 5 minutes.

## **8. Quantitative PCR setting**

The qPCR settings of fatty acid desaturase gene, RHDase gene and 1H2Nase gene were: 2 minutes at 95 °C, followed by 40 cycles of 15 seconds at 95 °C, 30 seconds at 58 °C, 35 seconds at 72 °C and 2 minutes at 95 °C, followed by 40 cycles of 15 seconds at 95 °C, 30 seconds at 59 °C, 35 seconds at 72 °C, respectively.

## **9. Cultivation in the PUM medium**

The liquid propionate uniquely modified (PUM) medium containing a single propionate as sole carbon and energy, was used to compare the changes of the CSH values for SA02 cells under different medium. As shown in Figure S6, the CSH values of SA02 cells grown in the PUM medium without addition of SDBS and phenanthrene were less than 15.5%, compared to 20.4-21.5% of the CSH values of SA02 cells grown in the LB medium. When strain SA02 cells grown in the propionate-free PUM medium with



addition of SDBS and phenanthrene, the CSH values were significantly higher than that of SA02 grown in MSM medium with SDBS and phenanthrene, and the CSH value even reached 95.5% at 30 mg L<sup>-1</sup> of SDBS applied. These results indicated that PUM medium with a single carbon was more favorable to the CSH changes of SA02 cells, compared to the LB medium with a complex carbon, and also confirmed that SDBS in test concentrations could change the CSH of SA02 cells. Nevertheless, the changed trends of the CSH were similar under the LB or PUM medium cultured for strain SA02.

## References

- (1) Allan, V. J. M.; Callow, M. E.; Macaskie, L. E.; Paterson-Beedle, M. Effect of nutrient limitation on biofilm formation and phosphatase activity of a *Citrobacter* sp. *Microbiology* **2002**, *148*, 277-288.
- (2) Morath, S.; Geyer, A.; Hartung, T. Structure-function relationship of cytokine induction by lipoteichoic acid from *Staphylococcus aureus*. *J. Exp. Med.* **2001**, *193*, 393-397.
- (3) Zhang, M.; Zhu, L.Z. Effect of SDBS-Tween 80 mixed surfactants on the distribution of polycyclic aromatic hydrocarbons in soil-water system. *J. Soils Sediments* **2010**, *10*, 1123-1130.
- (4) Zhao, B. W.; Zhu, L. Z.; Li, W.; Chen, B. L. Solubilization and biodegradation of phenanthrene in mixed anionic-nonionic surfactant solutions. *Chemosphere* **2005**, *58*, 33-40.

## Supporting Tables

**Table S1.** Oligonucleotide primers used in RT-qPCR.

| Name          | Sequence (5' to 3')     |
|---------------|-------------------------|
| 16S rRNA mF   | GGTTGCGATAC TGTGAGGTGGA |
| 16S rRNA mR   | GCGTTGCTGATCTGCGATTACT  |
| 1H2Nase mF    | AGCAGCGAAGGCATCGGAAC    |
| 1H2Nase mR    | GCGTCGAGGTCGTAGAGATTGA  |
| Desaturase mF | GCCATCTACGACCTTGAG      |
| Desaturase mR | GTCCTTGGTGAACCTGTGT     |
| RHDase mF     | CCGACAGCGTTCCTCAATGA    |
| RHDase mR     | GGCTTGGCGATCTCACTCTC    |

The suffixes F and R denote the forward and reverse primers, respectively.

The primer pair of 16S rRNA mF and 16S rRNA mR and the primer pair of 1H2Nase mF and 1H2Nase mR were designed by Primer 6.0, which were based on the partial 16S rRNA sequence (Genbank accession number: JQ796366.1),  $\Delta 9$  fatty acid desaturase (Genbank accession number: CP002379.1 (3587630..3588817)) and the 1H2Nase gene sequence (Genbank accession number: KF527570) and RHDase gene sequence (Genbank accession number: KM279943), respectively.

244 **Table S2** The changes of fatty acid content (%) of *Arthrobacter* sp. SA02 cells under different concentrations of SDBS.

| Fatty acids          | 10 mg L <sup>-1</sup> |           |           | 30 mg L <sup>-1</sup> |           |           | 50 mg L <sup>-1</sup> |           |           | 80 mg L <sup>-1</sup> |           |           | 0 mg L <sup>-1</sup> |           |           |
|----------------------|-----------------------|-----------|-----------|-----------------------|-----------|-----------|-----------------------|-----------|-----------|-----------------------|-----------|-----------|----------------------|-----------|-----------|
|                      | 4h                    | 6d        | 12d       | 4h                   | 6d        | 12d       |
| Saturated            |                       |           |           |                       |           |           |                       |           |           |                       |           |           |                      |           |           |
| C14:0                | 4.13±0.14             | 5.26±0.18 | 3.98±0.26 | 5.05±0.27             | 4.54±0.35 | 3.44±0.26 | 4.36±0.33             | 4.44±0.35 | 4.03±0.28 | 4.32±0.29             | 4.49±0.14 | 4.26±0.23 | 2.10±0.25            | 4.22±0.32 | 3.41±0.18 |
| C14:0iso             | 4.81±0.25             | 3.67±0.37 | 4.56±0.39 | 3.42±0.48             | 3.18±0.17 | 4.02±0.15 | 3.98±0.20             | 4.19±0.24 | 3.62±0.19 | 4.45±0.29             | 5.30±0.37 | 4.22±0.23 | 3.21±0.24            | 5.66±0.33 | 2.82±0.29 |
| C15:0                | 5.36±0.16             | 6.28±0.21 | 5.69±0.17 | 5.63±0.23             | 3.99±0.29 | 5.25±1.02 | 7.95±1.14             | 6.36±0.94 | 4.33±0.21 | 5.05±0.35             | 4.83±0.37 | 5.48±0.37 | 1.42±0.05            | 4.49±0.10 | 4.93±0.12 |
| C15:0iso             | 31.2±0.19             | 31.3±0.53 | 34.1±0.44 | 33.2±0.29             | 33.3±0.36 | 33.6±0.43 | 33.7±0.25             | 34.5±0.43 | 34.3±0.57 | 32.8±0.26             | 31.5±0.28 | 33.3±0.39 | 39.4±1.18            | 33.9±0.75 | 34.8±0.81 |
| C16:0                | 6.85±0.28             | 5.82±0.89 | 5.82±0.38 | 4.19±0.17             | 3.35±0.26 | 3.59±0.28 | 4.13±0.21             | 5.99±0.33 | 4.44±0.28 | 5.19±0.41             | 5.58±0.24 | 6.11±0.37 | 4.22±0.23            | 1.36±0.09 | 3.82±0.12 |
| C16:0anteiso         | 25.8±0.24             | 27.5±0.75 | 33.7±0.28 | 25.6±0.37             | 31.6±0.14 | 28.1±0.19 | 24.3±0.22             | 24.5±0.32 | 26.8±0.15 | 25.8±0.29             | 25.4±0.36 | 25.9±0.28 | 31.9±0.25            | 32.1±0.33 | 30.5±0.20 |
| C18:0                | 6.47±0.37             | 4.53±0.26 | 5.41±0.52 | 7.04±0.43             | 6.02±0.29 | 4.72±0.14 | 5.54±0.27             | 3.31±0.19 | 4.83±0.25 | 5.87±0.37             | 6.16±0.29 | 3.03±0.27 | 3.51±0.17            | 2.43±0.35 | 2.81±0.15 |
| Unsaturated          |                       |           |           |                       |           |           |                       |           |           |                       |           |           |                      |           |           |
| C16:1ω9              | 2.17±0.17             | 2.26±0.14 | 2.38±0.16 | 2.42±0.20             | 2.25±0.11 | 2.53±0.09 | 2.46±0.19             | 2.33±0.21 | 2.52±0.22 | 2.64±0.14             | 2.49±0.18 | 2.88±0.21 | 3.02±0.22            | 3.17±0.19 | 3.09±0.17 |
| C18:1ω9              | 5.85±1.03             | 6.60±0.44 | 6.29±0.47 | 6.08±0.29             | 6.84±0.37 | 6.29±0.29 | 6.50±1.12             | 7.09±0.87 | 7.24±0.75 | 6.73±0.55             | 6.14±0.47 | 6.95±0.36 | 4.40±0.41            | 6.08±0.37 | 6.05±0.28 |
| C18:2ω9,12           | 7.36±0.35             | 6.79±0.28 | 7.86±1.07 | 7.36±0.84             | 7.19±0.37 | 8.45±1.13 | 7.08±0.35             | 7.29±0.28 | 7.89±0.21 | 7.15±0.57             | 8.11±0.37 | 7.87±0.17 | 6.82±0.58            | 6.58±0.72 | 7.78±0.93 |
| Sat./unsat.<br>ratio | 5.50±0.19             | 5.39±0.21 | 5.05±0.11 | 5.31±0.17             | 5.14±0.22 | 4.79±0.18 | 5.23±0.20             | 4.98±0.31 | 4.67±0.27 | 5.05±0.29             | 4.97±0.32 | 4.65±0.19 | 6.02±0.19            | 5.32±0.21 | 4.91±0.35 |

245 The following fatty acid nomenclature was applied: the number preceding the colon indicates the total number of carbon atoms, the number  
246 following the colon indicates the number of double bonds, and the suffix designates the position of the double bonds (from the methyl end of the  
247 molecule) or the position of hydroxyl groups (from the carboxyl end of the molecule), namely, the saturated fatty acids (Cn:0), the unsaturated  
248 fatty acids (Cn:0 m ω l). The standard deviation (SD) was calculated from analysis of triplicate samples. The values are given as means±SE.

**Table S4.** The expression levels of RHD gene, 1H2Nase gene and  $\Delta 9$  fatty acid desaturase gene of strain SA02 grown in the LB medium containing SDBS (10, 30 and 50 mg L<sup>-1</sup>).

| medium                              | RHDase gene expression level |           |           | 1H2Nase gene expression level |           |           | $\Delta 9$ fatty acid desaturase gene expression level |           |           |
|-------------------------------------|------------------------------|-----------|-----------|-------------------------------|-----------|-----------|--------------------------------------------------------|-----------|-----------|
|                                     | 12 h                         | 24 h      | 36 h      | 12 h                          | 24 h      | 36 h      | 12 h                                                   | 24 h      | 36 h      |
| LB                                  | 1.00±0.00                    | 1.00±0.00 | 1.00±0.00 | 1.00±0.00                     | 1.00±0.00 | 1.00±0.00 | 1.00±0.00                                              | 1.00±0.00 | 1.00±0.00 |
| LB+SDBS<br>(10 mg L <sup>-1</sup> ) | 1.12±0.32                    | 1.21±0.29 | 0.99±0.45 | 0.87±0.13                     | 0.76±0.14 | 0.83±0.27 | 4.02±0.15                                              | 6.94±0.21 | 5.06±0.35 |
| LB+SDBS<br>(30 mg L <sup>-1</sup> ) | 0.97±0.26                    | 1.08±0.12 | 1.13±0.41 | 0.91±0.27                     | 0.65±0.31 | 1.07±0.35 | 6.92±0.53                                              | 7.14±0.39 | 6.99±0.25 |
| LB+SDBS<br>(50 mg L <sup>-1</sup> ) | 1.03±0.15                    | 0.99±0.25 | 1.07±0.39 | 0.97±0.36                     | 0.75±0.14 | 0.69±0.16 | 7.52±0.47                                              | 7.94±054  | 8.04±0.37 |

## Supporting Figures

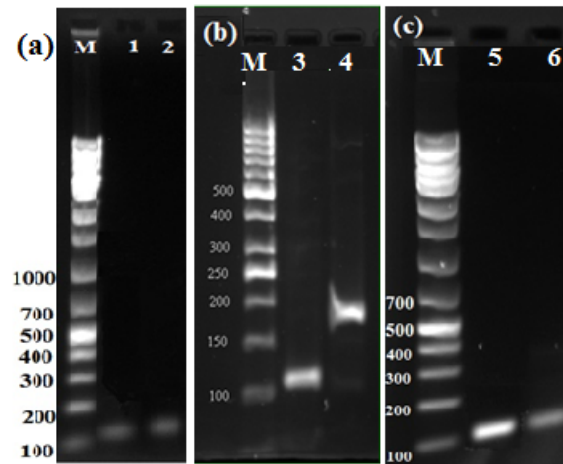

**Figure S1.** The agarose electrophoresis of the qPCR amplification fragments of the endogenous gene (16S rRNA) and the target genes: (a)  $\Delta 9$  fatty acid desaturase gene, (b) 1H2Nase gene and (c) RHDase gene. Note: M, DNA marker; 1, 3 and 5, 16S rRNA; 2, 4 and 6,  $\Delta 9$  fatty acid desaturase, 1H2Nase, and RHDase genes.

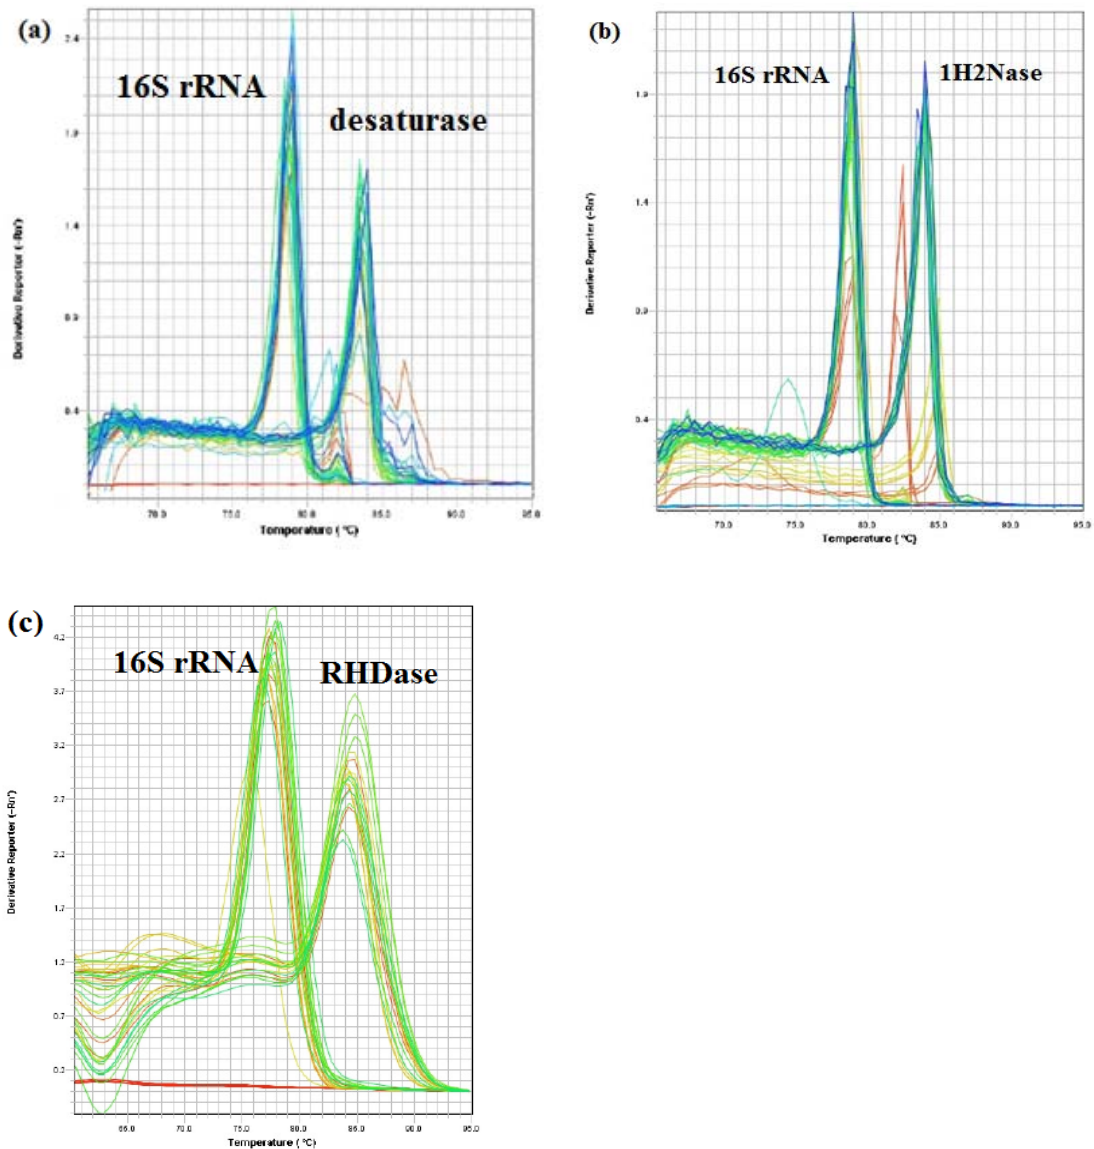

**Figure S2.** The melting curves of the endogenous gene 16S rRNA and the target genes: (a)  $\Delta 9$  fatty acid desaturase gene, (b) 1H2Nase gene and (c) RHDase gene by real time qPCR. The melting temperatures of these genes were clearly distinguished, indicating that the reaction procedure of qPCR was reasonable.

281

282

283

284

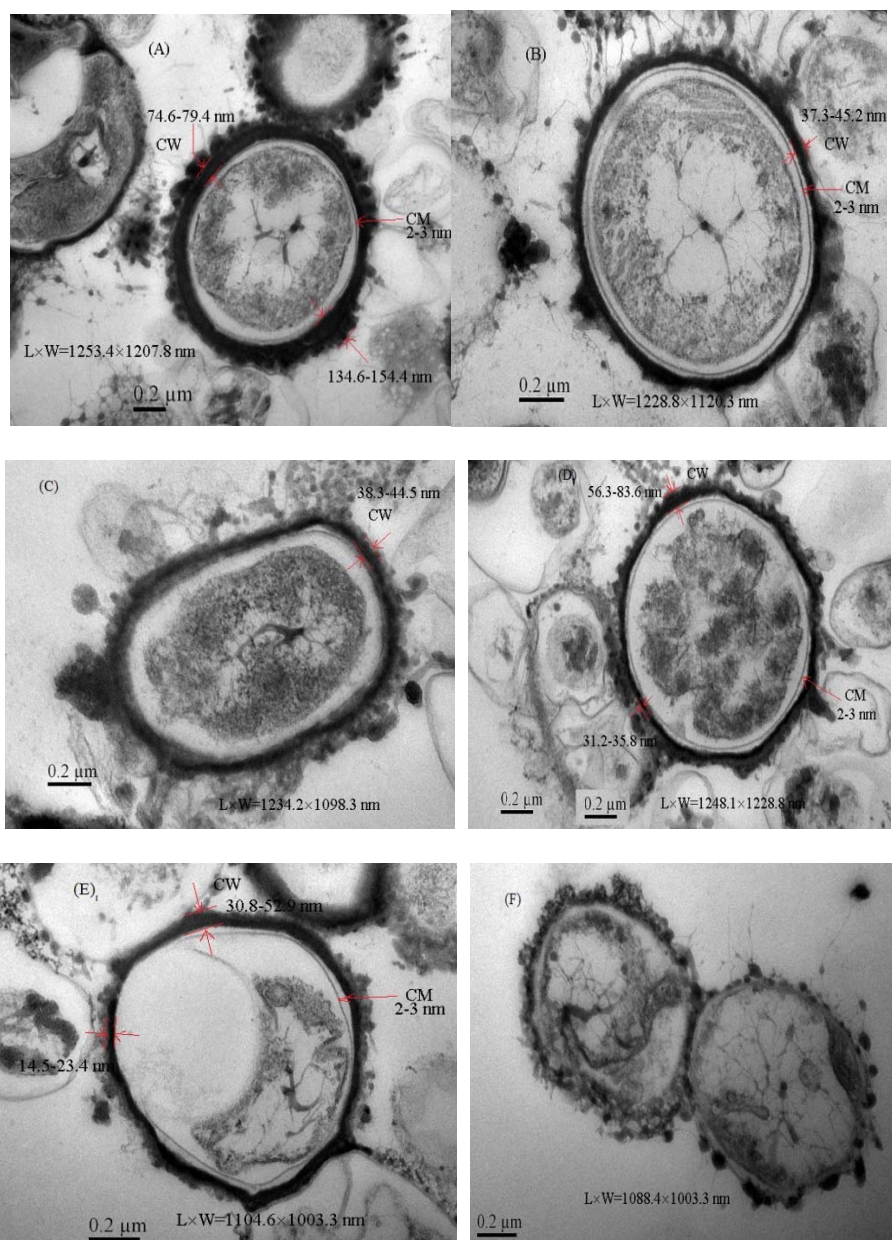

285 **Figure S3.** Effect of SDBS on cell surface microstructure of strain SA02 (A) LB culture  
 286 (B) phenanthrene, (C-F) phenanthrene+Tween 80: 10, 30 50 and 80 mg L<sup>-1</sup>, respectively.

287

288

289

290

291

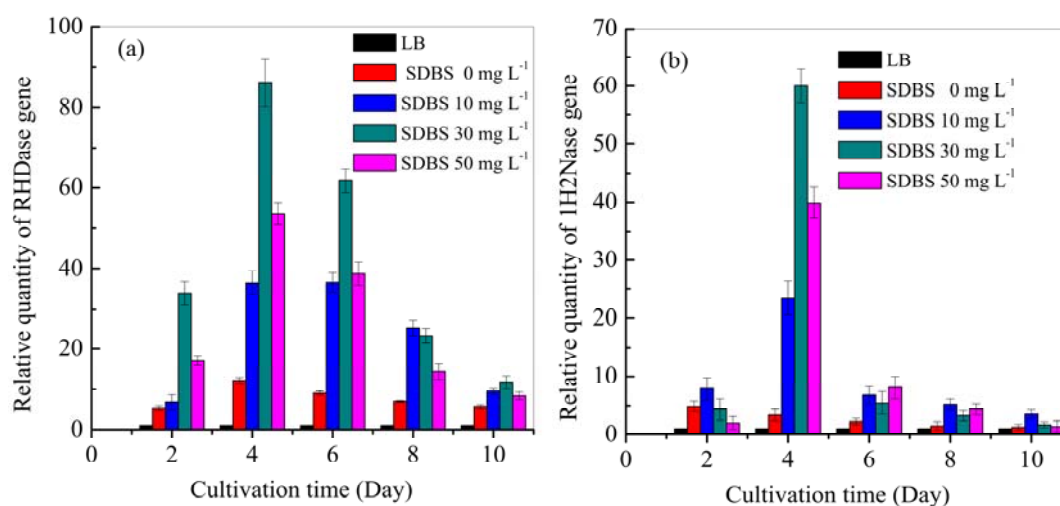

Figure S4. The relative quantities (i.e., expression levels) of (a) RHDase gene and (b) 1H2Nase gene of strain SA02 grown in 1.0 mg L<sup>-1</sup> of phenanthrene and different SDBS concentrations (0, 10, 30 and 50 mg L<sup>-1</sup>), and in the LB medium without phenanthrene and SDBS.



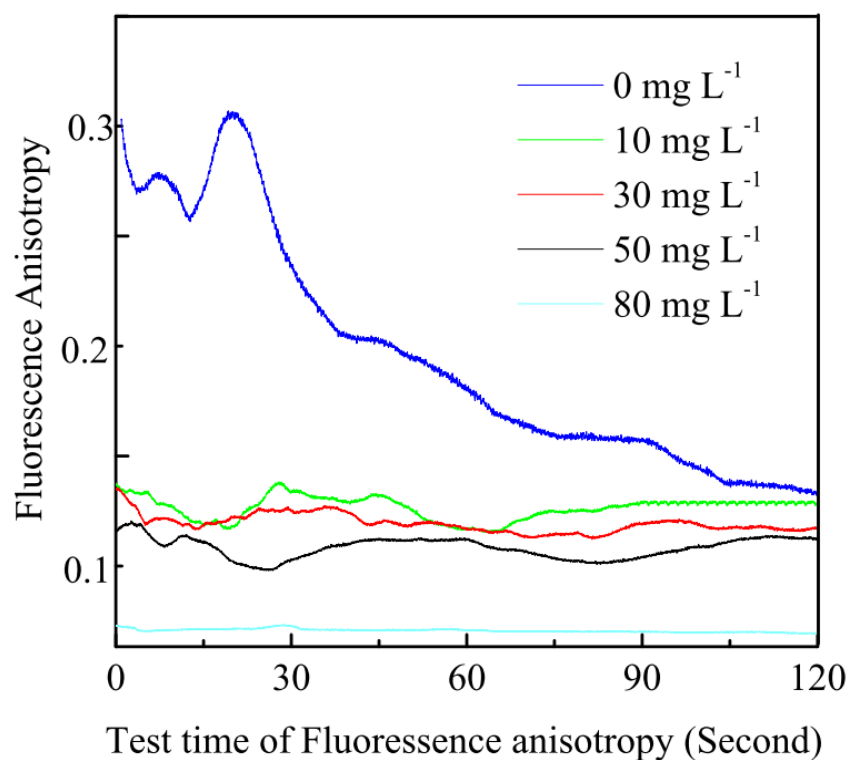

**Figure S5.** The changes of DPH fluorescence anisotropy in the membranes of SA02 cells under SDBS.

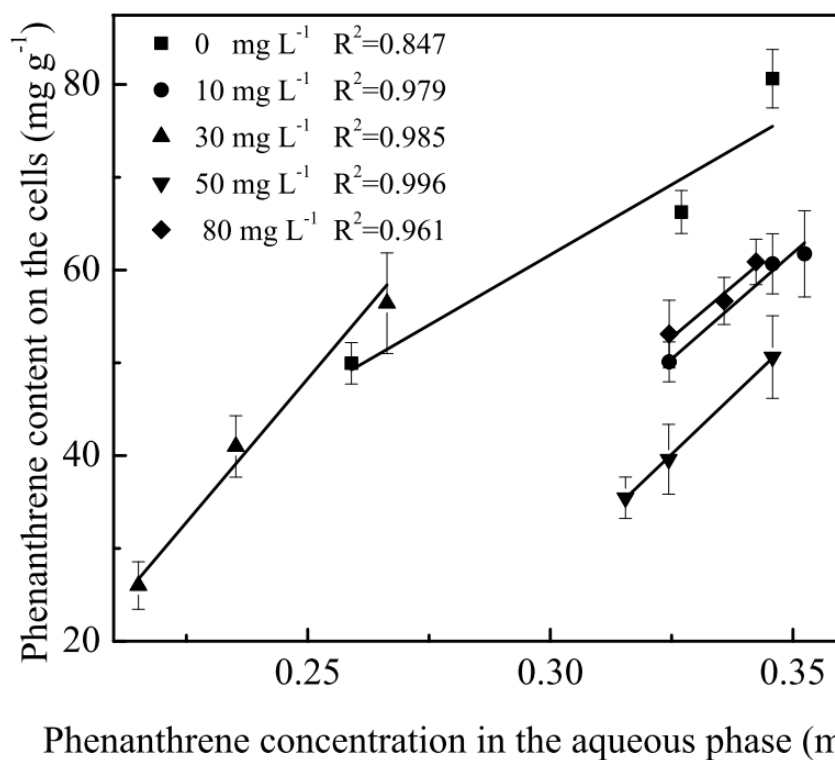

**Figure S6.** Effect of SDBS on phenanthrene partition (mean  $\pm$  sd) on strain SA02 cells.

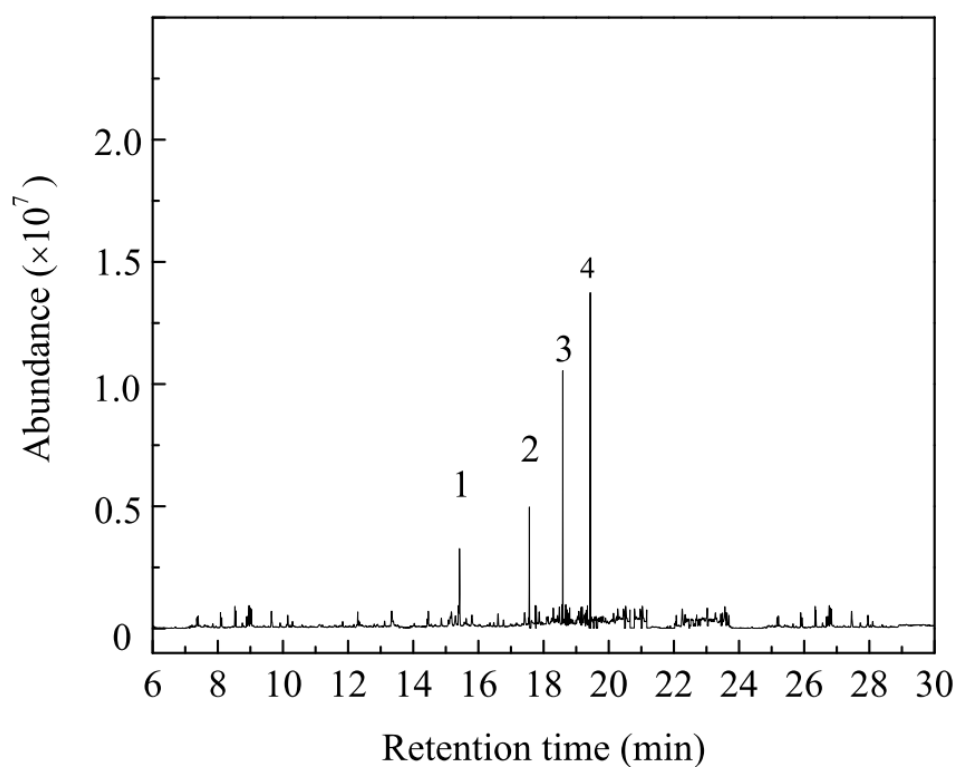

**Figure S7.** The GC-MS chromatograms of phenanthrene metabolites by strain SA02 on 4th day. 1. Peaks 1-4 denote salicylic acid, phthalic acid, protocatechuic acid and 1-hydroxy-2-naphthoic acid, respectively, all of which are trimethylsilyl (TMS) derivatives.

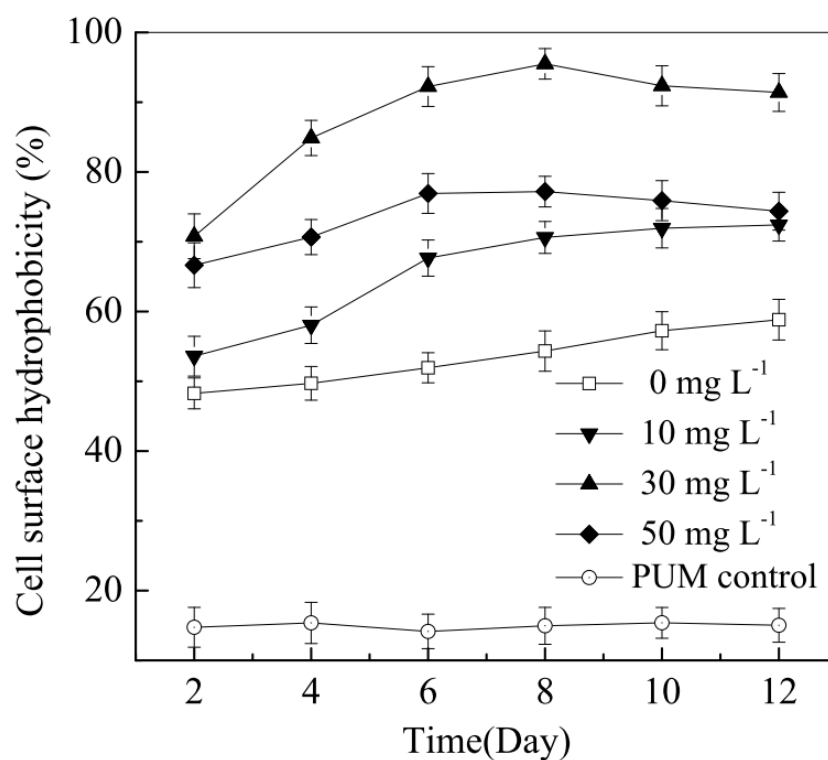

**Figure S8.** Effect of SDBS on the cell surface hydrophobicity (mean  $\pm$  sd) of strain SA02 cells grown in the PUM medium and the replaced propionate with phenanthrene (1.0 mg L<sup>-1</sup>) plus SDBS (0, 10, 30 and 50 mg L<sup>-1</sup>, respectively) as the treatments.

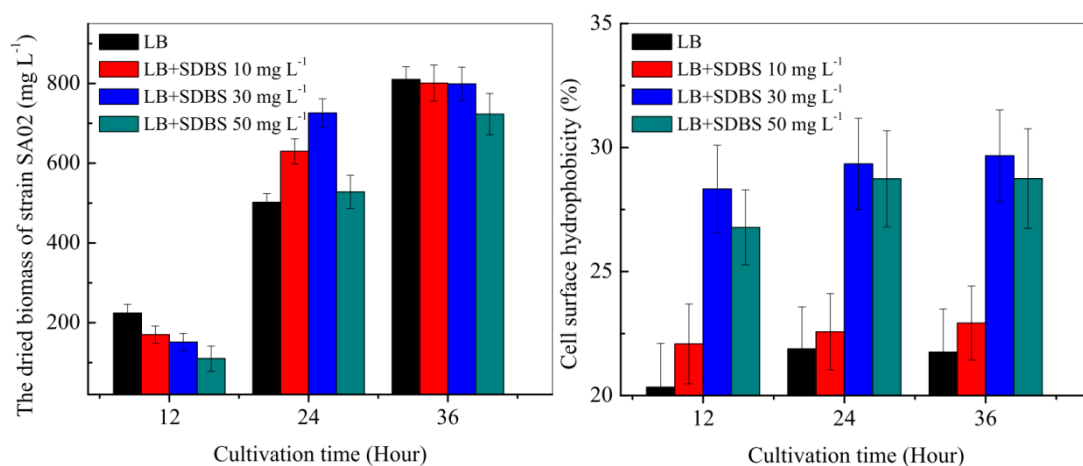

**Figure S9.** (a) The growth and (b) cell surface hydrophobicity (CSH) of strain SA02 grown in the LB medium containing SDBS (0, 10, 30 and 50 mg L<sup>-1</sup>).

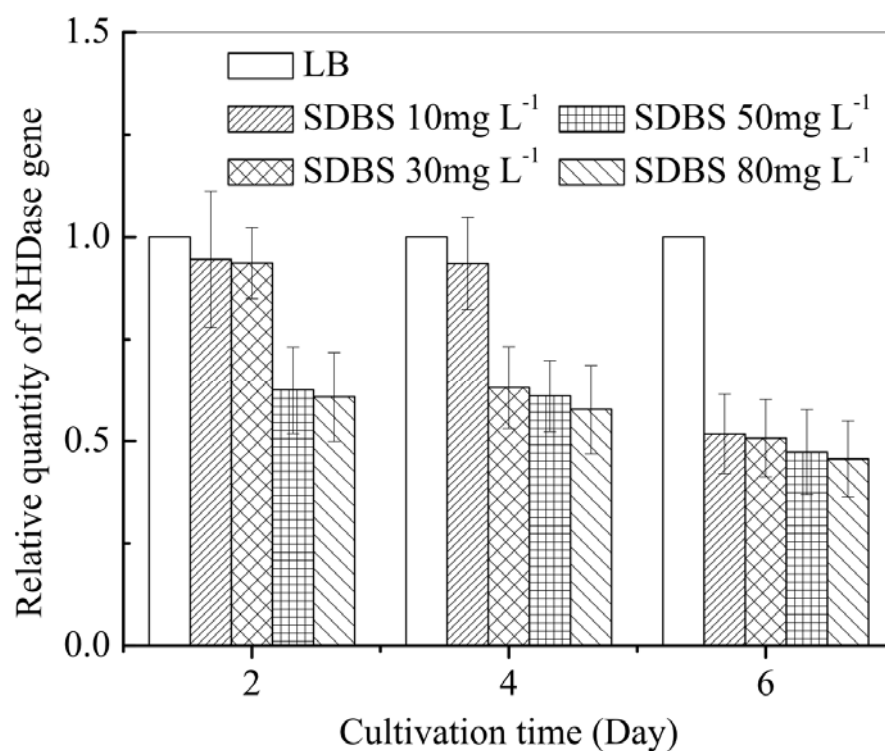

**Figure S10.** The expression level of RHDase gene of strain SA02 grown in the MSM medium containing SDBS (10, 30 and 50 mg L<sup>-1</sup>). Strain SA02 cells grown in the LB medium (in the absence of phenanthrene and SDBS) for 24 hours were used as the control.

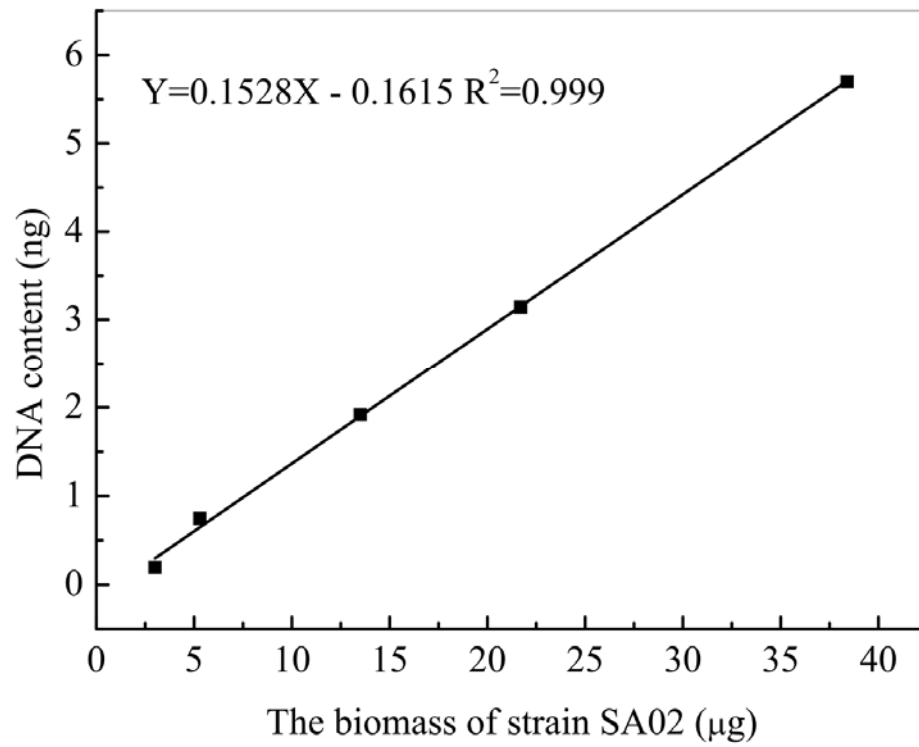

**Figure S11.** The relationship between the biomass of strain SA02 and its DNA content.

409

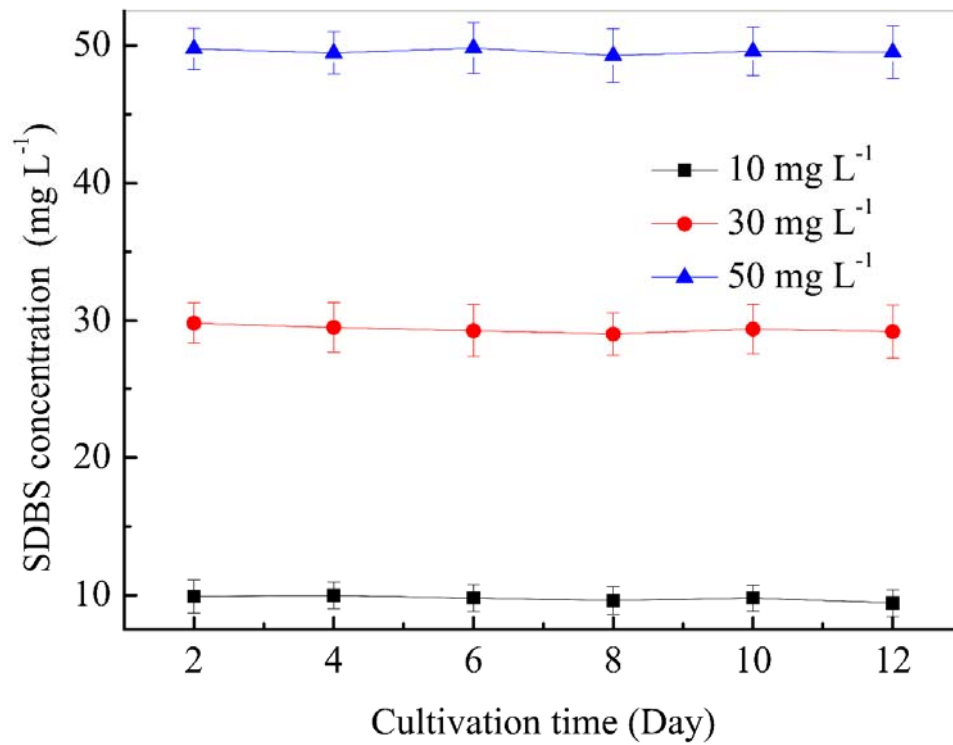

410

411 Figure S12. The concentration changes of SDBS when strain SA02 grew in the MSM  
412 medium with SDBS (10, 30 and 50 mg L<sup>-1</sup>) and in the absence of phenanthrene.

413

414

415

416

417

418

419

420

421

422

423



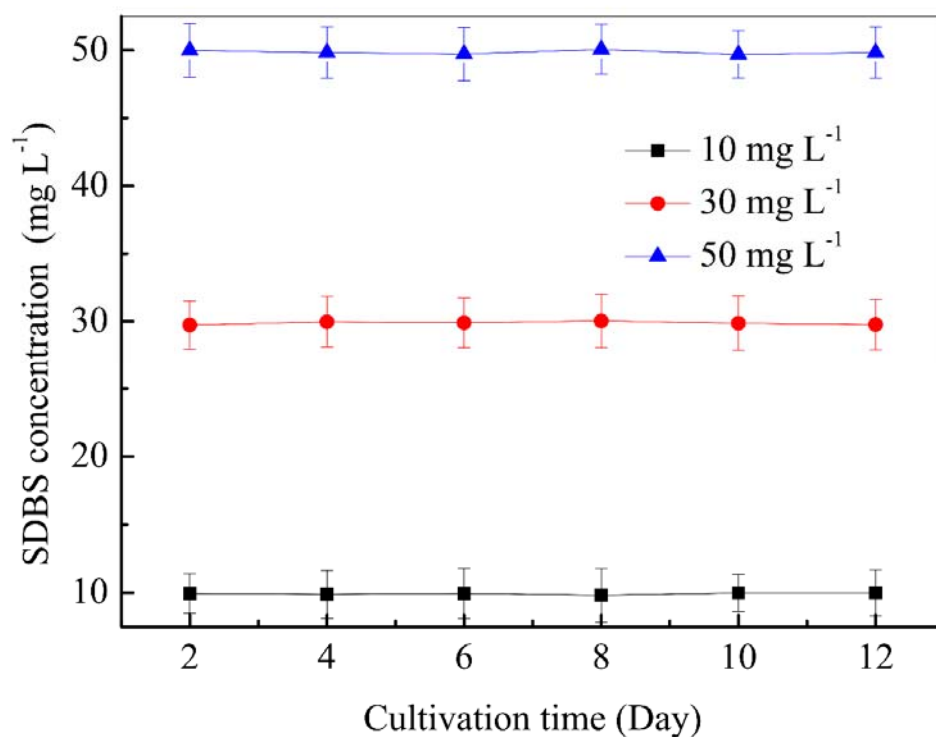

**Figure S13.** The concentration changes of SDBS when strain SA02 grew in the MSM medium with SDBS (10, 30 and 50 mg L<sup>-1</sup>) and in the presence of phenanthrene (1.0 mg L<sup>-1</sup>).

440

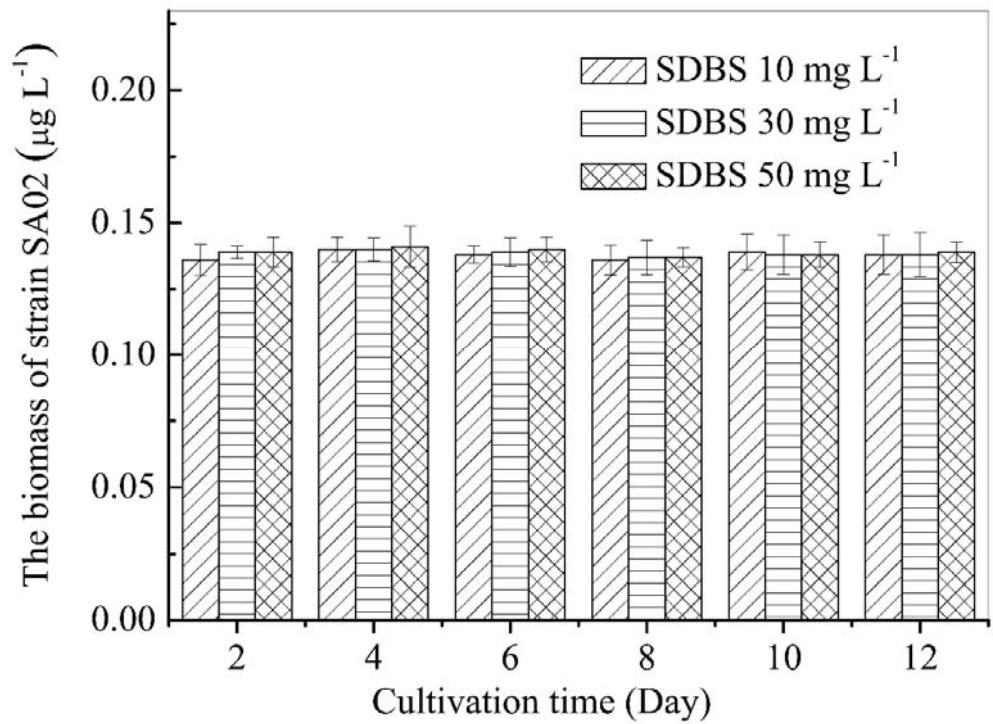

441

442 **Figure S14.** The biomass changes of strain SA02 grown in the MSM medium containing  
443 SDBS (10, 30 and 50 mg L<sup>-1</sup>) as the sole carbon source in the absence of phenanthrene.

444

445

446

447

448
